# Supplementary figures and images for: Identification of foreign gene sequences by transcript filtering against the human genome
Source: Springer Nature journal article supplement (doi:10.1038/ng818), 2002-01-14

Web Fig. A. PCR amplification of filtered EST sequences on HeLa cell DNA

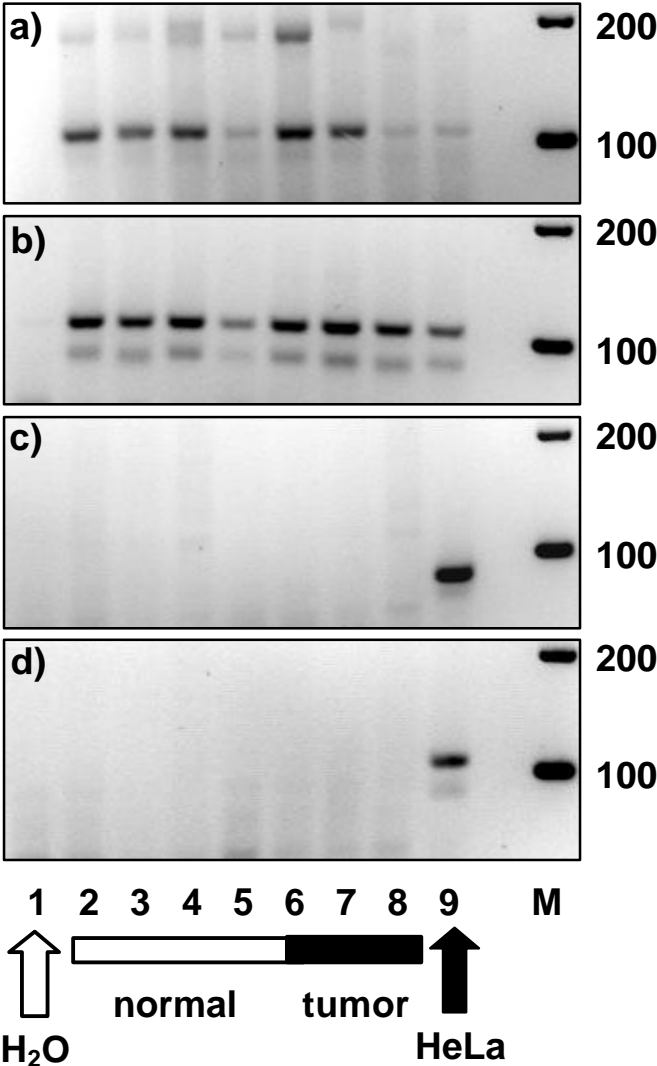

Supplement: ng818-S10.pdf [file ng818-S10.pdf]
